# Supplementary material for: HIV-1 Drug Resistance Detected by Next-Generation Sequencing among ART-Naïve Individuals: A Systematic Review and Meta-Analysis
Source: MDPI journal article supplement (doi:10.3390/v16020239), 2024-02-02
Supplement: s1 [file s1]

## *Supplementary Material*

# **HIV-1 Drug Resistance Detected by Next-Generation Sequencing among ART-Naïve Individuals: A Systematic Review and Meta-Analysis**

Fei Ouyang <sup>1</sup>, Defu Yuan <sup>1</sup>, Wenjing Zhai <sup>1</sup>, Shanshan Liu <sup>1</sup>, Ying Zhou <sup>2,\*</sup> and Haitao Yang <sup>1,3,\*</sup>

<sup>1</sup> Key Laboratory of Environmental Medicine Engineering of Ministry of Education, Department of Epidemiology and Health Statistics, School of Public Health, Southeast University, Nanjing 210009, China; 220213961@seu.edu.cn (F.O.); 230239083@seu.edu.cn (D.Y.); 220223638@seu.edu.cn (W.Z.); 220223703@seu.edu.cn (S.L.)

<sup>2</sup> Department of HIV/STD Control and Prevention, Jiangsu Provincial Center for Disease Control and Prevention, Nanjing 210009, China

<sup>3</sup> Jiangsu Health Development Research Center, Nanjing 210029, China

\* Correspondence: yht@jscdc.cn (H.Y.); zhouy@jscdc.cn (Y.Z.)

**Table S5.** Frequency of drug resistance mutations in protease at different sensitivity thresholds.

| PR     | Classification | Surveillance | 1-5% |      | 5-10% |      | 10-20% |      | >20% |      |
|--------|----------------|--------------|------|------|-------|------|--------|------|------|------|
|        |                |              | n    | %    | n     | %    | n      | %    | n    | %    |
| L10F   | Accessory      | N            | 3    | 0.04 | 1     | 0.01 | 1      | 0.01 | 2    | 0.03 |
| L10I   | Other          | N            | 53   | 0.70 | 14    | 0.18 | 18     | 0.24 | 318  | 4.18 |
| L10R   | Minor          | N            | 10   | 0.13 | 1     | 0.01 | 0      | 0.00 | 0    | 0.00 |
| L10V   | Other          | N            | 6    | 0.08 | 4     | 0.05 | 5      | 0.07 | 90   | 1.18 |
| V11I   | Other          | N            | 14   | 0.18 | 3     | 0.04 | 5      | 0.07 | 12   | 0.16 |
| K20I   | Other          | N            | 1    | 0.01 | 0     | 0.00 | 0      | 0.00 | 10   | 0.13 |
| K20M   | Other          | N            | 1    | 0.01 | 1     | 0.01 | 0      | 0.00 | 16   | 0.21 |
| K20R   | Other          | N            | 34   | 0.45 | 14    | 0.18 | 10     | 0.13 | 113  | 1.48 |
| K20T   | Minor          | N            | 0    | 0.00 | 2     | 0.03 | 0      | 0.00 | 0    | 0.00 |
| L23I   | Minor          | Y            | 27   | 0.35 | 0     | 0.00 | 1      | 0.01 | 0    | 0.00 |
| L24I   | Accessory      | Y            | 4    | 0.05 | 0     | 0.00 | 0      | 0.00 | 1    | 0.01 |
| L24M   | Accessory      | N            | 1    | 0.01 | 0     | 0.00 | 0      | 0.00 | 0    | 0.00 |
| D30N   | Major          | Y            | 41   | 0.54 | 3     | 0.04 | 2      | 0.03 | 6    | 0.08 |
| V32I   | Major          | Y            | 10   | 0.13 | 1     | 0.01 | 1      | 0.01 | 1    | 0.01 |
| L33F   | Minor          | N            | 0    | 0.00 | 0     | 0.00 | 1      | 0.01 | 13   | 0.17 |
| L33I   | Minor          | N            | 2    | 0.03 | 0     | 0.00 | 0      | 0.00 | 2    | 0.03 |
| L33V   | Other          | N            | 3    | 0.04 | 2     | 0.03 | 1      | 0.01 | 11   | 0.14 |
| E35G   | Minor          | N            | 1    | 0.01 | 0     | 0.00 | 0      | 0.00 | 1    | 0.01 |
| M36I   | Other          | N            | 2    | 0.03 | 0     | 0.00 | 0      | 0.00 | 4    | 0.05 |
| K43T   | Accessory      | N            | 2    | 0.03 | 2     | 0.03 | 1      | 0.01 | 8    | 0.11 |
| M46I   | Major          | Y            | 57   | 0.75 | 13    | 0.17 | 10     | 0.13 | 31   | 0.41 |
| M46L   | Major          | Y            | 13   | 0.17 | 3     | 0.04 | 3      | 0.04 | 17   | 0.22 |
| M46V   | Accessory      | N            | 1    | 0.04 | 1     | 0.04 | 0      | 0.00 | 3    | 0.12 |
| M46I/L | Major          | Y            | 91   | 1.20 | 0     | 0.00 | 0      | 0.00 | 33   | 0.43 |
| I47V   | Major          | Y            | 19   | 0.25 | 3     | 0.04 | 1      | 0.01 | 1    | 0.01 |
| G48V   | Major          | N            | 2    | 0.03 | 0     | 0.00 | 0      | 0.00 | 0    | 0.00 |
| I50L   | Major          | N            | 4    | 0.05 | 0     | 0.00 | 0      | 0.00 | 0    | 0.00 |
| I50V   | Major          | Y            | 8    | 0.11 | 0     | 0.00 | 1      | 0.01 | 1    | 0.01 |
| F53L   | Accessory      | Y            | 13   | 0.17 | 2     | 0.03 | 4      | 0.05 | 1    | 0.01 |
| F53Y   | Accessory      | N            | 1    | 0.01 | 0     | 0.00 | 0      | 0.00 | 0    | 0.00 |
| I54L   | Major          | Y            | 1    | 0.01 | 2     | 0.03 | 0      | 0.00 | 1    | 0.01 |
| I54M   | Major          | Y            | 0    | 0.00 | 0     | 0.00 | 0      | 0.00 | 1    | 0.01 |
| I54S   | Major          | N            | 1    | 0.01 | 0     | 0.00 | 0      | 0.00 | 0    | 0.00 |
| I54T   | Major          | Y            | 5    | 0.07 | 1     | 0.01 | 2      | 0.03 | 0    | 0.00 |
| I54V   | Major          | Y            | 2    | 0.03 | 0     | 0.00 | 1      | 0.01 | 9    | 0.12 |
| Q58E   | Accessory      | N            | 1    | 0.01 | 0     | 0.00 | 0      | 0.00 | 52   | 0.68 |
| D60E   | Major          | N            | 1    | 0.01 | 0     | 0.00 | 0      | 0.00 | 0    | 0.00 |
| L63P   | Other          | N            | 3    | 0.04 | 0     | 0.00 | 0      | 0.00 | 6    | 0.08 |
| L67V   | Other          | N            | 0    | 0.00 | 0     | 0.00 | 0      | 0.00 | 2    | 0.03 |
| L68V   | Accessory      | N            | 4    | 0.05 | 2     | 0.03 | 3      | 0.04 | 1    | 0.01 |
| A71I   | Other          | N            | 5    | 0.07 | 0     | 0.00 | 0      | 0.00 | 7    | 0.09 |
| A71T   | Other          | N            | 32   | 0.42 | 8     | 0.11 | 11     | 0.14 | 301  | 3.95 |
| A71V   | Other          | N            | 17   | 0.22 | 14    | 0.18 | 9      | 0.12 | 416  | 5.46 |
| G73C   | Accessory      | Y            | 1    | 0.01 | 0     | 0.00 | 0      | 0.00 | 0    | 0.00 |
| G73S   | Accessory      | Y            | 1    | 0.01 | 1     | 0.01 | 1      | 0.01 | 0    | 0.00 |
| L74I   | Other          | N            | 2    | 0.03 | 0     | 0.00 | 2      | 0.03 | 78   | 1.02 |
| L74M   | Other          | N            | 23   | 0.30 | 2     | 0.03 | 2      | 0.03 | 9    | 0.12 |
| T74S   | Other          | N            | 11   | 0.14 | 0     | 0.00 | 0      | 0.00 | 7    | 0.09 |
| L76V   | Major          | Y            | 2    | 0.03 | 0     | 0.00 | 0      | 0.00 | 2    | 0.03 |
| V77I   | Other          | N            | 1    | 0.01 | 1     | 0.01 | 0      | 0.00 | 1    | 0.01 |
| G73C   | Accessory      | Y            | 1    | 0.01 | 0     | 0.00 | 0      | 0.00 | 0    | 0.00 |
| G73S   | Accessory      | Y            | 6    | 0.08 | 0     | 0.00 | 0      | 0.00 | 1    | 0.01 |
| V82A   | Major          | Y            | 26   | 0.34 | 2     | 0.03 | 1      | 0.01 | 7    | 0.09 |
| V82I   | Other          | N            | 32   | 0.42 | 7     | 0.09 | 10     | 0.13 | 88   | 1.16 |

| PR   | Classification | Surveillance | 1-5% |      | 5-10% |      | 10-20% |      | >20% |      |
|------|----------------|--------------|------|------|-------|------|--------|------|------|------|
|      |                |              | n    | %    | n     | %    | n      | %    | n    | %    |
| V82F | Major          | Y            | 4    | 0.05 | 0     | 0.00 | 0      | 0.00 | 1    | 0.01 |
| V82L | Major          | Y            | 0    | 0.00 | 0     | 0.00 | 1      | 0.01 | 1    | 0.01 |
| V82T | Major          | Y            | 1    | 0.01 | 0     | 0.00 | 0      | 0.00 | 0    | 0.00 |
| N83D | Minor          | Y            | 7    | 0.09 | 2     | 0.03 | 0      | 0.00 | 1    | 0.01 |
| I84V | Major          | Y            | 8    | 0.11 | 0     | 0.00 | 0      | 0.00 | 8    | 0.11 |
| I85V | Other          | N            | 10   | 0.13 | 1     | 0.01 | 3      | 0.04 | 17   | 0.22 |
| N88D | Minor          | Y            | 15   | 0.20 | 1     | 0.01 | 0      | 0.00 | 2    | 0.03 |
| N88G | Major          | N            | 0    | 0.00 | 0     | 0.00 | 0      | 0.00 | 15   | 0.20 |
| N88S | Major          | Y            | 10   | 0.13 | 1     | 0.01 | 0      | 0.00 | 0    | 0.00 |
| N88T | Major          | N            | 0    | 0.00 | 0     | 0.00 | 0      | 0.00 | 1    | 0.01 |
| L89I | Other          | N            | 0    | 0.00 | 0     | 0.00 | 0      | 0.00 | 2    | 0.03 |
| L89M | Other          | N            | 1    | 0.01 | 1     | 0.01 | 0      | 0.00 | 11   | 0.14 |
| L89V | Minor          | N            | 0    | 0.00 | 0     | 0.00 | 0      | 0.00 | 1    | 0.01 |
| L90M | Major          | Y            | 5    | 0.07 | 1     | 0.01 | 0      | 0.00 | 53   | 0.70 |

All drug resistance mutations reported. Analyses for 7614 individuals.

**Table S6.** Frequency of drug resistance mutations to NRTI at different sensitivity thresholds.

| RT      | Classification | Surveillance | 1-5% |      | 5-10% |      | 10-20% |      | >20% |      |
|---------|----------------|--------------|------|------|-------|------|--------|------|------|------|
|         |                |              | n    | %    | n     | %    | n      | %    | n    | %    |
| M41I    | Other          | N            | 29   | 0.38 | 2     | 0.03 | 0      | 0.00 | 34   | 0.45 |
| M41L    | NRTI           | Y            | 12   | 0.16 | 2     | 0.03 | 0      | 0.00 | 59   | 0.77 |
| E44D    | NRTI           | N            | 2    | 0.03 | 0     | 0.00 | 1      | 0.01 | 10   | 0.13 |
| A62V    | NRTI           | N            | 4    | 0.05 | 0     | 0.00 | 1      | 0.01 | 12   | 0.16 |
| K65E    | NRTI           | N            | 3    | 0.04 | 0     | 0.00 | 1      | 0.01 | 0    | 0.00 |
| K65R    | NRTI           | Y            | 29   | 0.38 | 3     | 0.04 | 1      | 0.01 | 2    | 0.03 |
| K65N    | NRTI           | N            | 0    | 0.00 | 1     | 0.01 | 0      | 0.00 | 0    | 0.00 |
| A67N    | Other          | N            | 0    | 0.00 | 0     | 0.00 | 0      | 0.00 | 1    | 0.01 |
| D67E    | NRTI           | Y            | 239  | 3.14 | 62    | 0.81 | 1      | 0.01 | 6    | 0.08 |
| D67N    | NRTI           | Y            | 122  | 1.60 | 4     | 0.05 | 3      | 0.04 | 11   | 0.14 |
| D67G    | NRTI           | Y            | 26   | 0.34 | 3     | 0.04 | 5      | 0.07 | 3    | 0.04 |
| S68G    | Other          | N            | 1    | 0.01 | 5     | 0.07 | 3      | 0.04 | 123  | 1.62 |
| T69A    | Other          | N            | 22   | 0.29 | 9     | 0.12 | 6      | 0.08 | 23   | 0.30 |
| T69D    | NRTI           | Y            | 5    | 0.07 | 3     | 0.04 | 4      | 0.05 | 13   | 0.17 |
| T69E    | Other          | N            | 3    | 0.04 | 0     | 0.00 | 0      | 0.00 | 0    | 0.00 |
| T69I    | Other          | N            | 1    | 0.01 | 2     | 0.03 | 1      | 0.01 | 0    | 0.00 |
| T69N    | Other          | N            | 211  | 2.77 | 35    | 0.46 | 8      | 0.11 | 22   | 0.29 |
| T69S    | Other          | N            | 5    | 0.07 | 4     | 0.05 | 8      | 0.11 | 21   | 0.28 |
| K70E    | NRTI           | Y            | 8    | 0.11 | 0     | 0.00 | 0      | 0.00 | 1    | 0.01 |
| K70G    | NRTI           | N            | 0    | 0.00 | 0     | 0.00 | 0      | 0.00 | 1    | 0.01 |
| K70N    | NRTI           | N            | 1    | 0.01 | 0     | 0.00 | 0      | 0.00 | 0    | 0.00 |
| K70Q    | NRTI           | N            | 2    | 0.03 | 0     | 0.00 | 0      | 0.00 | 0    | 0.00 |
| K70R    | NRTI           | N            | 16   | 0.21 | 2     | 0.03 | 3      | 0.04 | 7    | 0.09 |
| K70T    | NRTI           | N            | 2    | 0.03 | 0     | 0.00 | 0      | 0.00 | 2    | 0.03 |
| L74I    | NRTI           | Y            | 73   | 0.96 | 1     | 0.01 | 0      | 0.00 | 3    | 0.04 |
| L74V    | NRTI           | Y            | 19   | 0.25 | 1     | 0.01 | 1      | 0.01 | 4    | 0.05 |
| V75A    | NRTI           | Y            | 14   | 0.18 | 6     | 0.08 | 2      | 0.03 | 0    | 0.00 |
| V75I    | NRTI           | N            | 19   | 0.25 | 1     | 0.01 | 0      | 0.00 | 9    | 0.12 |
| V75L    | NRTI           | N            | 2    | 0.03 | 0     | 0.00 | 1      | 0.01 | 0    | 0.00 |
| V75M    | NRTI           | Y            | 4    | 0.05 | 0     | 0.00 | 0      | 0.00 | 5    | 0.07 |
| V75S    | NRTI           | N            | 4    | 0.05 | 0     | 0.00 | 0      | 0.00 | 1    | 0.01 |
| V75T    | NRTI           | Y            | 0    | 0.00 | 0     | 0.00 | 0      | 0.00 | 1    | 0.01 |
| F77L    | NRTI           | Y            | 138  | 1.81 | 1     | 0.01 | 1      | 0.01 | 5    | 0.07 |
| V90I    | Other          | N            | 17   | 0.22 | 9     | 0.12 | 6      | 0.08 | 76   | 1.00 |
| Y115F   | NRTI           | Y            | 1    | 0.01 | 0     | 0.00 | 0      | 0.00 | 4    | 0.05 |
| F116Y   | NRTI           | N            | 1    | 0.01 | 0     | 0.00 | 0      | 0.00 | 1    | 0.01 |
| M184V   | NRTI           | Y            | 36   | 0.47 | 5     | 0.07 | 3      | 0.04 | 21   | 0.28 |
| M184I   | NRTI           | Y            | 30   | 0.39 | 5     | 0.07 | 3      | 0.04 | 10   | 0.13 |
| M184V/I | NRTI           | Y            | 23   | 0.30 | 2     | 0.03 | 0      | 0.00 | 4    | 0.05 |
| L210F   | Other          | N            | 2    | 0.03 | 0     | 0.00 | 0      | 0.00 | 4    | 0.05 |
| L210S   | Other          | N            | 0    | 0.00 | 0     | 0.00 | 0      | 0.00 | 5    | 0.07 |
| L210W   | NRTI           | Y            | 8    | 0.11 | 3     | 0.04 | 1      | 0.01 | 18   | 0.24 |
| T215A   | NRTI           | N            | 10   | 0.13 | 2     | 0.03 | 0      | 0.00 | 6    | 0.08 |
| T215C   | NRTI           | Y            | 1    | 0.01 | 0     | 0.00 | 0      | 0.00 | 19   | 0.25 |
| T215D   | NRTI           | Y            | 0    | 0.00 | 1     | 0.01 | 1      | 0.01 | 11   | 0.14 |
| T215E   | NRTI           | Y            | 1    | 0.01 | 0     | 0.00 | 0      | 0.00 | 8    | 0.11 |
| T215F   | NRTI           | Y            | 1    | 0.01 | 1     | 0.01 | 0      | 0.00 | 0    | 0.00 |
| T215I   | NRTI           | Y            | 4    | 0.05 | 1     | 0.01 | 0      | 0.00 | 4    | 0.05 |
| T215L   | NRTI           | N            | 0    | 0.00 | 0     | 0.00 | 0      | 0.00 | 4    | 0.05 |
| T215N   | NRTI           | N            | 26   | 0.34 | 2     | 0.03 | 1      | 0.01 | 2    | 0.03 |
| T215S   | NRTI           | Y            | 6    | 0.08 | 1     | 0.01 | 2      | 0.03 | 39   | 0.51 |
| T215Y   | NRTI           | Y            | 3    | 0.04 | 0     | 0.00 | 1      | 0.01 | 1    | 0.01 |
| K219E   | NRTI           | Y            | 9    | 0.12 | 4     | 0.05 | 1      | 0.01 | 7    | 0.09 |
| K219N   | NRTI           | Y            | 4    | 0.05 | 2     | 0.03 | 0      | 0.00 | 9    | 0.12 |
| K219Q   | NRTI           | Y            | 8    | 0.11 | 4     | 0.05 | 2      | 0.03 | 4    | 0.05 |

| RT    | Classification | Surveillance | 1-5% |      | 5-10% |      | 10-20% |      | >20% |      |
|-------|----------------|--------------|------|------|-------|------|--------|------|------|------|
|       |                |              | n    | %    | n     | %    | n      | %    | n    | %    |
| K219R | NRTI           | Y            | 20   | 0.26 | 3     | 0.04 | 4      | 0.05 | 1    | 0.01 |

Analyses for 7614 individuals.

**Table S7.** Frequency of drug resistance mutations to NNRTI at different sensitivity thresholds.

| RT    | Classification | Surveillance | 1-5% |      | 5-10% |      | 10-20% |      | >20% |      |
|-------|----------------|--------------|------|------|-------|------|--------|------|------|------|
|       |                |              | n    | %    | n     | %    | n      | %    | n    | %    |
| A98G  | NNRTI          | N            | 1    | 0.01 | 0     | 0.00 | 0      | 0.00 | 8    | 0.11 |
| L100I | NNRTI          | N            | 26   | 0.34 | 1     | 0.01 | 0      | 0.00 | 5    | 0.07 |
| L100V | NNRTI          | N            | 2    | 0.03 | 0     | 0.00 | 0      | 0.00 | 0    | 0.00 |
| K101E | NNRTI          | Y            | 21   | 0.28 | 4     | 0.05 | 3      | 0.04 | 23   | 0.30 |
| K101H | NNRTI          | N            | 0    | 0.00 | 0     | 0.00 | 0      | 0.00 | 1    | 0.01 |
| K101N | Other          | N            | 1    | 0.01 | 0     | 0.00 | 0      | 0.00 | 0    | 0.00 |
| K101P | NNRTI          | Y            | 0    | 0.00 | 0     | 0.00 | 0      | 0.00 | 1    | 0.01 |
| K101Q | Other          | N            | 1    | 0.01 | 5     | 0.07 | 3      | 0.04 | 66   | 0.87 |
| K101R | Other          | N            | 4    | 0.05 | 1     | 0.01 | 1      | 0.01 | 11   | 0.14 |
| K101T | Other          | N            | 1    | 0.01 | 0     | 0.00 | 0      | 0.00 | 1    | 0.01 |
| K103E | NNRTI          | N            | 3    | 0.04 | 4     | 0.05 | 0      | 0.00 | 3    | 0.04 |
| K103H | NNRTI          | N            | 1    | 0.01 | 0     | 0.00 | 0      | 0.00 | 0    | 0.00 |
| K103N | NNRTI          | Y            | 20   | 0.26 | 17    | 0.22 | 15     | 0.20 | 246  | 3.23 |
| K103Q | NNRTI          | N            | 0    | 0.00 | 0     | 0.00 | 2      | 0.03 | 2    | 0.03 |
| K103R | Other          | N            | 21   | 0.28 | 9     | 0.12 | 9      | 0.12 | 162  | 2.13 |
| K103S | NNRTI          | Y            | 4    | 0.05 | 5     | 0.07 | 3      | 0.04 | 15   | 0.20 |
| K103T | NNRTI          | N            | 1    | 0.01 | 0     | 0.00 | 0      | 0.00 | 3    | 0.04 |
| V106A | NNRTI          | Y            | 11   | 0.14 | 4     | 0.05 | 5      | 0.07 | 5    | 0.07 |
| V106I | Other          | N            | 39   | 0.51 | 15    | 0.20 | 9      | 0.12 | 117  | 1.54 |
| V106M | NNRTI          | Y            | 2    | 0.03 | 0     | 0.00 | 1      | 0.01 | 3    | 0.04 |
| V108I | NNRTI          | N            | 29   | 0.38 | 7     | 0.09 | 10     | 0.13 | 40   | 0.53 |
| V118I | Other          | N            | 15   | 0.20 | 1     | 0.01 | 11     | 0.14 | 121  | 1.59 |
| E138A | NNRTI          | N            | 4    | 0.05 | 0     | 0.00 | 1      | 0.01 | 25   | 0.33 |
| E138G | NNRTI          | N            | 8    | 0.11 | 0     | 0.00 | 0      | 0.00 | 1    | 0.01 |
| E138K | NNRTI          | N            | 22   | 0.29 | 0     | 0.00 | 0      | 0.00 | 4    | 0.05 |
| V179D | NNRTI          | N            | 13   | 0.17 | 8     | 0.11 | 5      | 0.07 | 91   | 1.20 |
| V179E | NNRTI          | N            | 3    | 0.04 | 1     | 0.01 | 1      | 0.01 | 89   | 1.17 |
| V179F | NNRTI          | Y            | 1    | 0.01 | 0     | 0.00 | 0      | 0.00 | 2    | 0.03 |
| V179I | NNRTI          | N            | 29   | 0.38 | 24    | 0.32 | 10     | 0.13 | 316  | 4.15 |
| V179L | NNRTI          | N            | 0    | 0.00 | 0     | 0.00 | 0      | 0.00 | 2    | 0.03 |
| V179T | NNRTI          | N            | 4    | 0.05 | 2     | 0.03 | 2      | 0.03 | 6    | 0.08 |
| Y181C | NNRTI          | Y            | 11   | 0.14 | 8     | 0.11 | 4      | 0.05 | 33   | 0.43 |
| Y188C | NNRTI          | Y            | 14   | 0.18 | 8     | 0.11 | 1      | 0.01 | 3    | 0.04 |
| Y181I | NNRTI          | N            | 1    | 0.01 | 0     | 0.00 | 0      | 0.00 | 0    | 0.00 |
| Y188H | NNRTI          | Y            | 9    | 0.12 | 3     | 0.04 | 1      | 0.01 | 2    | 0.03 |
| Y188L | NNRTI          | Y            | 0    | 0.00 | 0     | 0.00 | 0      | 0.00 | 16   | 0.21 |
| G190A | NNRTI          | Y            | 7    | 0.09 | 6     | 0.08 | 10     | 0.13 | 37   | 0.49 |
| G190E | NNRTI          | Y            | 23   | 0.30 | 4     | 0.05 | 0      | 0.00 | 7    | 0.09 |
| G190S | NNRTI          | Y            | 3    | 0.04 | 0     | 0.00 | 0      | 0.00 | 3    | 0.04 |
| G190V | NNRTI          | N            | 1    | 0.01 | 0     | 0.00 | 0      | 0.00 | 0    | 0.00 |
| H221Y | NNRTI          | N            | 7    | 0.09 | 2     | 0.03 | 0      | 0.00 | 7    | 0.09 |
| P225H | NNRTI          | Y            | 133  | 1.75 | 5     | 0.07 | 3      | 0.04 | 19   | 0.25 |
| F227C | NNRTI          | N            | 9    | 0.12 | 0     | 0.00 | 0      | 0.00 | 0    | 0.00 |
| F227L | NNRTI          | N            | 79   | 1.04 | 3     | 0.04 | 2      | 0.03 | 2    | 0.03 |
| M230I | NNRTI          | N            | 10   | 0.13 | 2     | 0.03 | 1      | 0.01 | 0    | 0.00 |
| M230L | NNRTI          | Y            | 3    | 0.04 | 0     | 0.00 | 0      | 0.00 | 0    | 0.00 |
| P236L | NNRTI          | N            | 1    | 0.01 | 0     | 0.00 | 0      | 0.00 | 0    | 0.00 |
| K238N | NNRTI          | N            | 0    | 0.00 | 2     | 0.03 | 0      | 0.00 | 0    | 0.00 |
| K238R | Other          | N            | 27   | 0.35 | 11    | 0.14 | 5      | 0.07 | 13   | 0.17 |
| K238T | NNRTI          | N            | 1    | 0.01 | 0     | 0.00 | 1      | 0.01 | 5    | 0.07 |
| Y318F | NNRTI          | N            | 1    | 0.01 | 0     | 0.00 | 0      | 0.00 | 1    | 0.01 |
| N348I | NNRTI          | N            | 3    | 0.04 | 0     | 0.00 | 1      | 0.01 | 4    | 0.05 |

**Table S8.** Frequency of drug resistance mutations in integrase at different sensitivity thresholds.

| IN    | Classification | Surveillance | 1-5% |      | 5-10% |      | 10-20% |      | >20% |       |
|-------|----------------|--------------|------|------|-------|------|--------|------|------|-------|
|       |                |              | n    | %    | n     | %    | n      | %    | n    | %     |
| H51Y  | Accessory      | N            | 5    | 0.12 | 0     | 0.00 | 0      | 0.00 | 0    | 0.00  |
| T66A  | Major          | Y            | 4    | 0.10 | 1     | 0.02 | 1      | 0.02 | 0    | 0.00  |
| T66I  | Major          | Y            | 6    | 0.14 | 2     | 0.05 | 2      | 0.05 | 1    | 0.02  |
| T66K  | Major          | Y            | 164  | 3.95 | 0     | 0.00 | 0      | 0.00 | 0    | 0.00  |
| L74I  | Other          | N            | 1    | 0.02 | 0     | 0.00 | 1      | 0.02 | 33   | 0.80  |
| L74M  | Other          | N            | 1    | 0.02 | 1     | 0.02 | 0      | 0.00 | 5    | 0.12  |
| L74V  | Accessory      | N            | 1    | 0.02 | 0     | 0.00 | 0      | 0.00 | 0    | 0.00  |
| E92G  | Major          | N            | 7    | 0.17 | 1     | 0.02 | 0      | 0.00 | 0    | 0.00  |
| E92V  | Major          | N            | 1    | 0.02 | 0     | 0.00 | 0      | 0.00 | 0    | 0.00  |
| E92Q  | Major          | Y            | 1    | 0.02 | 0     | 0.00 | 0      | 0.00 | 0    | 0.00  |
| Q95K  | Accessory      | N            | 34   | 0.82 | 0     | 0.00 | 0      | 0.00 | 7    | 0.17  |
| T97A  | Accessory      | N            | 12   | 0.29 | 1     | 0.02 | 2      | 0.05 | 13   | 0.31  |
| G118R | Major          | N            | 0    | 0.00 | 1     | 0.02 | 0      | 0.00 | 0    | 0.00  |
| F121Y | Major          | Y            | 1    | 0.02 | 0     | 0.00 | 0      | 0.00 | 0    | 0.00  |
| A128T | Accessory      | N            | 11   | 0.27 | 5     | 0.12 | 3      | 0.07 | 3    | 0.07  |
| E138D | Other          | N            | 11   | 0.27 | 5     | 0.12 | 5      | 0.12 | 124  | 2.99  |
| E138K | Major          | N            | 14   | 0.34 | 9     | 0.22 | 3      | 0.07 | 4    | 0.10  |
| E138A | Major          | N            | 1    | 0.02 | 1     | 0.02 | 0      | 0.00 | 10   | 0.24  |
| G140C | Major          | Y            | 2    | 0.05 | 0     | 0.00 | 0      | 0.00 | 0    | 0.00  |
| G140S | Major          | Y            | 3    | 0.07 | 2     | 0.05 | 0      | 0.00 | 0    | 0.00  |
| Y143C | Major          | Y            | 5    | 0.12 | 0     | 0.00 | 1      | 0.02 | 0    | 0.00  |
| Y143H | Major          | Y            | 5    | 0.12 | 0     | 0.00 | 0      | 0.00 | 0    | 0.00  |
| P145S | Major          | N            | 5    | 0.12 | 0     | 0.00 | 0      | 0.00 | 0    | 0.00  |
| Q146P | Major          | N            | 6    | 0.14 | 0     | 0.00 | 0      | 0.00 | 0    | 0.00  |
| S147G | Major          | Y            | 14   | 0.34 | 2     | 0.05 | 1      | 0.02 | 0    | 0.00  |
| Q148H | Major          | Y            | 2    | 0.05 | 0     | 0.00 | 0      | 0.00 | 1    | 0.02  |
| Q148K | Major          | Y            | 25   | 0.60 | 0     | 0.00 | 0      | 0.00 | 0    | 0.00  |
| Q148R | Major          | Y            | 7    | 0.17 | 1     | 0.02 | 1      | 0.02 | 1    | 0.02  |
| V151A | Accessory      | N            | 3    | 0.07 | 1     | 0.02 | 1      | 0.02 | 0    | 0.00  |
| V151I | Other          | N            | 24   | 0.58 | 8     | 0.19 | 4      | 0.10 | 19   | 0.46  |
| S153F | Accessory      | N            | 2    | 0.05 | 1     | 0.02 | 2      | 0.05 | 0    | 0.00  |
| S153Y | Accessory      | N            | 25   | 0.60 | 0     | 0.00 | 0      | 0.00 | 0    | 0.00  |
| N155H | Major          | Y            | 2    | 0.05 | 0     | 0.00 | 0      | 0.00 | 0    | 0.00  |
| N155S | Major          | Y            | 3    | 0.07 | 0     | 0.00 | 0      | 0.00 | 0    | 0.00  |
| N155T | Major          | N            | 0    | 0.00 | 1     | 0.02 | 0      | 0.00 | 0    | 0.00  |
| E157Q | Accessory      | N            | 4    | 0.10 | 2     | 0.05 | 2      | 0.05 | 17   | 0.41  |
| G163K | Accessory      | N            | 1    | 0.02 | 1     | 0.02 | 0      | 0.00 | 4    | 0.10  |
| G163R | Accessory      | N            | 12   | 0.29 | 1     | 0.02 | 1      | 0.02 | 2    | 0.05  |
| S230N | Other          | N            | 26   | 0.63 | 6     | 0.14 | 13     | 0.31 | 436  | 10.51 |
| S230R | Accessory      | N            | 130  | 3.13 | 3     | 0.07 | 1      | 0.02 | 2    | 0.05  |
| R263K | Accessory      | N            | 5    | 0.12 | 1     | 0.02 | 0      | 0.00 | 1    | 0.02  |

Analyses for 4148 individuals.
