# Supplementary material for: HIV-1 Drug Resistance Detected by Next-Generation Sequencing among ART-Naïve Individuals: A Systematic Review and Meta-Analysis
Source: MDPI journal article supplement (doi:10.3390/v16020239), 2024-02-02
Supplement: s1 [file s1]

Table S2. Compare the pretreatment drug resistance between 5% and 10% threshold.

| Variables | Subgroup | Study | Event | Total | $\chi^2$ | P value |
|-----------|----------|-------|-------|-------|----------|---------|
| PDR       | 5%       | 7     | 361   | 2524  | 1.89     | 0.171   |
|           | 10%      | 3     | 103   | 830   |          |         |
| NNRTI     | 5%       | 7     | 354   | 4321  | 1.59     | 0.207   |
|           | 10%      | 2     | 29    | 447   |          |         |
| NRTI      | 5%       | 7     | 251   | 4321  | 0.34     | 0.561   |
|           | 10%      | 2     | 29    | 447   |          |         |
| PI        | 5%       | 7     | 226   | 5042  | 1.67     | 0.196   |
|           | 10%      | 2     | 26    | 447   |          |         |
| INSTI     | 5%       | 3     | 28    | 1811  | 4.62     | 0.032   |
|           | 10%      | 1     | 1     | 425   |          |         |

Table S3. Compare the pretreatment drug resistance between 2% and 5% threshold.

| Variables | Subgroup | Study | Event | Total | $\chi^2$ | P value |
|-----------|----------|-------|-------|-------|----------|---------|
| PDR       | 2%       | 6     | 581   | 2778  | 39.57    | <0.01   |
|           | 5%       | 7     | 361   | 2163  |          |         |
| NNRTI     | 2%       | 6     | 279   | 3229  | 0.483    | 0.487   |
|           | 5%       | 7     | 354   | 3967  |          |         |
| NRTI      | 2%       | 6     | 301   | 3229  | 33.65    | <0.01   |
|           | 5%       | 7     | 251   | 4070  |          |         |
| PI        | 2%       | 6     | 419   | 3951  | 124.72   | <0.01   |
|           | 5%       | 7     | 226   | 4816  |          |         |
| INSTI     | 2%       | 2     | 50    | 1713  | 6.96     | 0.008   |
|           | 5%       | 3     | 28    | 1783  |          |         |

Table S4: Compare the pretreatment drug resistance between 2% and 10% threshold.

| Variables    | Subgroup | Study | Event | Total | $\chi^2$ | P value |
|--------------|----------|-------|-------|-------|----------|---------|
| <b>PDR</b>   | 2%       | 6     | 581   | 2197  | 39.57    | <0.01   |
|              | 10%      | 3     | 103   | 727   |          |         |
| <b>NNRTI</b> | 2%       | 6     | 279   | 2950  | 0.483    | 0.487   |
|              | 10%      | 2     | 29    | 418   |          |         |
| <b>NRTI</b>  | 2%       | 6     | 301   | 2928  | 33.65    | <0.01   |
|              | 10%      | 2     | 29    | 447   |          |         |
| <b>PI</b>    | 2%       | 6     | 419   | 3532  | 124.72   | <0.01   |
|              | 10%      | 2     | 26    | 447   |          |         |
| <b>INSTI</b> | 2%       | 2     | 50    | 1713  | 6.96     | 0.008   |
|              | 10%      | 1     | 1     | 425   |          |         |
