# Supplementary material for: HIV-1 Drug Resistance Detected by Next-Generation Sequencing among ART-Naïve Individuals: A Systematic Review and Meta-Analysis
Source: MDPI journal article supplement (doi:10.3390/v16020239), 2024-02-02
Supplement: s1 [file s1]

# HIV-1 Drug Resistance Detected by Next-Generation Sequencing among ART-Naïve Individuals: A Systematic Review and Meta-Analysis

Fei Ouyang <sup>1</sup>, Defu Yuan <sup>1</sup>, Wenjing Zhai <sup>1</sup>, Shanshan Liu <sup>1</sup>, Ying Zhou <sup>2,\*</sup> and Haitao Yang <sup>1,3,\*</sup>

<sup>1</sup> Key Laboratory of Environmental Medicine Engineering of Ministry of Education, Department of Epidemiology and Health Statistics, School of Public Health, Southeast University, Nanjing 210009, China; 220213961@seu.edu.cn (F.O.); 230239083@seu.edu.cn (D.Y.); 220223638@seu.edu.cn (W.Z.); 220223703@seu.edu.cn (S.L.)

<sup>2</sup> Department of HIV/STD Control and Prevention, Jiangsu Provincial Center for Disease Control and Prevention, Nanjing 210009, China

<sup>3</sup> Jiangsu Health Development Research Center, Nanjing 210029, China

\* Correspondence: yht@jscdc.cn (H.Y.); zhouy@jscdc.cn (Y.Z.)

## 1 Supplementary Table

**Table S1: The characteristics and literature quality scores of studies included in the meta-analysis.**

| Study              | Geographic area | Year of sample collection | Sample size | Amplification success | Female (%) | Design          | Age                           | Data report | NGS technology             | Stage of HIV-1 infection at time of inclusion | Type of specimen | NGS thresholds       | Study purpose | CD4 (cells/uL)                                     | VL (log10 copies/mL)                                                      | The score of quality |
|--------------------|-----------------|---------------------------|-------------|-----------------------|------------|-----------------|-------------------------------|-------------|----------------------------|-----------------------------------------------|------------------|----------------------|---------------|----------------------------------------------------|---------------------------------------------------------------------------|----------------------|
| Lataillade (2009)  | Worldwide       | --                        | 148         | 141                   | 34         | case-control    | --                            | SGS and NGS | 454 pyrosequencing         | Not specified                                 | Plasma           | <20%, 20%            | TDR           | Median:191                                         | 5.12 (3.48-5.86)                                                          | 8                    |
| Simen (2009)       | Not specified   | --                        | 264         | 258                   | 15.9       | cross-sectional | Mean: 38.5                    | SGS and NGS | 454 pyrosequencing         | (Mainly) chronic                              | Plasma           | 1%                   | LA-DRVs       | Median(IQR): 206 (32-336)                          | Median(IQR): 5.35 (4.91-5.76)                                             | 6                    |
| Messiae (2012)     | Europe          | 1999-2007                 | 70          | 70                    | --         | cohort          | Median(IQR): 35 (29-41)       | NGS         | 454 pyrosequencing         | Not specified                                 | Plasma           | <20%, 20%            | TDR           | Median(IQR): 237(188-316)                          | Median(IQR): 2.3-5.0                                                      | 5                    |
| Ji, H. (2013)      | North America   | --                        | 183         | 183                   | --         | cross-sectional | --                            | SGS and NGS | Pyrosequencing (Pyro-Mark) | Not specified                                 | Serum            | 5%, 10%, 15%, 20%    | LA-DRVs       | --                                                 | --                                                                        | 5                    |
| Garcia-Diaz (2014) | Not specified   | --                        | 107         | 107                   | --         | cross-sectional | --                            | SGS and NGS | 454 pyrosequencing         | Acute/recnet                                  | Plasma           | 1%, 20%              | TDR           | --                                                 | Median(range):4.95 (3.14-6.33)                                            | 5                    |
| Vandenhende (2014) | Europe          | 2000.01-2009.06           | 29          | 28                    | 20.7       | cross-sectional | Median(IQR): 36.8 (33.0-39.4) | SGS and NGS | 454 pyrosequencing         | Not specified                                 | Plasma           | <20%, 20%            | LA-DRVs       | Median(IQR): 248(177-314)                          | Median(IQR): 5.0(4.6-5.2)                                                 | 5                    |
| Zou (2014)         | Asia            | 2010.07-2011.08           | 90          | 90                    | --         | cross-sectional | Median(range): 37 (20-70)     | NGS         | 454 pyrosequencing         | Not specified                                 | Plasma           | 1%                   | TDR           | Median(range): 101.5 (8-332)                       | Median(range): 4.87 (3.60-6.19)                                           | 7                    |
| Cheriro (2015)     | Africa          | 2009.09-2011.10           | 60          | 60                    | --         | cross-sectional | —                             | NGS         | 454 pyrosequencing         | Not specified                                 | Plasma           | 1%, 20%              | LA-DRVs       | --                                                 | --                                                                        | 5                    |
| Avila-Ríos (2016)  | North America   | 2015.02-2015.07           | 288         | 264                   | 15         | cross-sectional | Median(IQR):31 (24-39)        | SGS and NGS | Illumina NGS               | (Mainly) chronic                              | Plasma           | 2%, 5%, 10%, 20%     | PDR           | Median(IQR): 258 (86-428)                          | Median(IQR): 4.8 (4.2-5.3)                                                | 8                    |
| Avila-Ríos (2016)  | Latin America   | 2011.08-2015.10           | 283         | 257                   | 20.1       | cohort          | Median(IQR):31 (25-40)        | SGS and NGS | Illumina NGS               | (Mainly) chronic                              | Plasma           | 1%, 2%, 5%, 10%, 20% | PDR           | Median(IQR):284 (92-459)                           | Median(IQR): 4.9 (4.2-5.5)                                                | 8                    |
| Cho (2016)         | Asia            | 2011.01-2011.04           | 35          | 35                    | --         | cross-sectional | --                            | NGS         | 454 pyrosequencing         | (Mainly) chronic                              | Plasma           | 1%, 10%, 20%         | PDR           | --                                                 | Median(IQR): Donors: 4.64 (4.03-5.20), Chronic patients: 5.53 (5.00-5.35) | 7                    |
| Moscona (2017)     | Asia            | 2000-2014                 | 80          | 80                    | 20         | cohort          | Median(IQR):30.5 (18–45)      | SGS and NGS | Illumina NGS               | Acute/recnet                                  | Plasma           | 1%, 5%               | TDR           | Median(IQR): 405 (310-579)                         | Median(IQR): 5.5 (4.6-6.2)                                                | 6                    |
| Todesco (2017)     | Europe          | --                        | 140         | 140                   | 0          | cohort          | --                            | SGS and NGS | 454 pyrosequencing         | Not specified                                 | Plasma           | <20%, 20%            | TDR           | Median(IQR):MSM: 498 (347-585); HSL: 348 (208-497) | Median(IQR):MSM: 4.9 (4.4-5.4); HSL: 4.9 (4.3-5.3)                        | 7                    |

|                          |               |                     |      |      |      |                 |                               |             |                    |               |                  |                  |         |                                  |                                 |   |
|--------------------------|---------------|---------------------|------|------|------|-----------------|-------------------------------|-------------|--------------------|---------------|------------------|------------------|---------|----------------------------------|---------------------------------|---|
| Alidjinou (2017)         | Europe        | 2013.10-2015.06     | 48   | 48   | 12.5 | cross-sectional | Median(IQR): 36.5 (26.5–49.3) | SGS and NGS | 454 pyrosequencing | Not specified | Plasma           | 5%. 20%          | PDR     | Median(IQR): 351.5 (172.5-493.8) | Median(IQR): 3.6 (3.2-4.0)      | 5 |
| Cunningham (2017)        | Europe        | 2011.07-2013.12     | 442  | 442  | 0    | cross-sectional | Median(IQR): 32 (26-40)       | NGS         | Illumina NGS       | Not specified | Plasma           | 2%, 2-20%, 20%   | TDR     | --                               | --                              | 8 |
| Inzaule (2018)           | Africa        | 2007.03-2014.11     | 399  | 383  | 60.0 | cohort          | Median(IQR): 36.9 (31.0-42.8) | NGS         | Illumina NGS       | Not specified | Plasma           | 1%, 5%, 10%,20%  | PDR     | Median(IQR): 120 (53-192)        | Median(IQR): 5.2 (4.5-5.7)      | 8 |
| Sili (2018)              | Asia          | 2013.01-2013.12     | 50   | 43   | 13.9 | cross-sectional | Median(IQR): 32.5 (27-41)     | NGS         | 454 pyrosequencing | Not specified | Plasma           | 2%-20%, 20%      | TDR     | --                               | --                              | 6 |
| Telele (2018)            | Africa        | 2009.10-2011.12     | 109  | 109  | 55   | cohort          | Median: 30                    | SGS and NGS | Illumina NGS       | Not specified | Plasma           | 1%               | PDR     | Mean±SD: 125±81                  | Mean±SD: 5.44±0.6               | 8 |
| Zhou (2018)              | Africa        | 2008.2-2008.6       | 20   | 20   | --   | cross-sectional | --                            | NGS         | 454 pyrosequencing | Not specified | Plasma           | 1-20%, 20%       | LA-DRVs | --                               | Range: 4.02-6.31                | 5 |
| Inzaule (2018)           | Africa        | 2007-2009           | 489  | 425  | 59.5 | cohort          | Median(IQR): 36.0 (30.0–42.0) | NGS         | Illumina NGS       | Not specified | Plasma           | 1%, 2%, 5%, 10%  | PDR     | Median(IQR): 119.0 (53.0-192.5)  | --                              | 7 |
| Mbunkah (2018)           | Africa        | 2015-2016           | 360  | 298  | 63   | cross-sectional | Median(range): 36 (18-68)     | NGS         | Illumina NGS       | Not specified | Dried blood spot | 15%, 3%-15%      | TDR     | Median(range): 303 (1-1112)      | Median(range): 4.4 (3.7-5.9)    | 8 |
| Leda (2018)              | Latin America | 2002-2009           | 25   | 25   | --   | cohort          | --                            | NGS         | 454 pyrosequencing | Acute/recnet  | Plasma           | 2%               | LA-DRVs | --                               | --                              | 5 |
| Stekler (2018)           | North America | 1992-2010           | 50   | 50   | 50   | cohort          | Median(IQR): 29(24-33)        | NGS         | 454 pyrosequencing | Acute/recnet  | PBMCS            | 1%               | TDR     | --                               | --                              | 5 |
| Anne (2019)              | Africa        | 2012.03-2016.06     | 1328 | 1148 | 70.3 | cohort          | Median(IQR): 32.9 (25.6-45.2) | NGS         | Illumina NGS       | Not specified | Plasma           | 5%, 20%          | PDR     | Median(IQR): 404 (262,559)       | Median(IQR): 4.5 (3.9-5.2)      | 8 |
| Hassan (2019)            | Africa        | 2008-2013           | 50   | 50   | 72   | cohort          | Median(IQR): 34.7(28.9-42.0)  | NGS         | Illumina NGS       | Not specified | Plasma           | 2%, <20%         | PDR     | Median(IQR): 348 (16-1076)       | --                              | 5 |
| Beck (2020)              | Africa        | 2006, 2010, 2013.04 | 1231 | 1231 | 70.7 | cohort          | --                            | NGS         | Illumina NGS       | Not specified | Plasma           | 2%               | PDR     | Median(IQR): 186 (102-278)       | Median(IQR): 4.95 (4.23- 5.55)  | 6 |
| Matias-Florentino (2020) | North America | 2016.04-2018.06     | 2496 | 2447 | 4.3  | cross-sectional | --                            | NGS         | Illumina NGS       | Not specified | Plasma           | 20%              | TDR     | --                               | --                              | 5 |
| Nicholas (2020)          | Asia          | 2012-2017           | 318  | 292  | --   | cross-sectional | --                            | NGS         | Illumina NGS       | Not specified | Plasma           | <20%, 20%        | LA-DRVs | --                               | --                              | 5 |
| Neuhann (2020)           | Africa        | 2014-2015           | 200  | 197  | 61.9 | cross-sectional | --                            | NGS         | Illumina NGS       | Not specified | Serum            | 1%               | PDR     | Median(IQR):247.5(89-420)        | Median(IQR):5.05(4.33-5.66)     | 8 |
| Emmi (2021)              | Europe        | 2017.01-2019.03     | 220  | 193  | 75.6 | cross-sectional | --                            | SGS and NGS | Illumina NGS       | Not specified | Plasma           | <5%, 5%-19%, 20% | PDR     | 330 (0-1200)                     | 5.0 (1.7->7)                    | 7 |
| Baxter (2021)            | Worldwide     | 2009.04-2013.12     | 2902 | 2901 | 27   | cross-sectional | Median: 36                    | NGS         | Illumina NGS       | Not specified | Plasma           | 2%, 5%, 20%      | TDR     | Median: 643                      | Median: 4.3                     | 7 |
| Cecchini (2021)          | Latin America | 2008-2014           | 40   | 40   | 100  | cohort          | --                            | NGS         | Illumina NGS       | Not specified | Plasma           | 1%               | TDR     | --                               | --                              | 5 |
| Li (2021)                | Africa        | 2014.08-2018.07     | 178  | 178  | 64   | case-cohort     | Median(IQR): 32(27-42)        | NGS         | Illumina NGS       | Not specified | Plasma           | <20%, 20%        | PDR     | --                               | --                              | 7 |
| Boyce (2022)             | North America | --                  | 69   | 66   | 100  | case-cohort     | Median(range): 25(14-44)      | NGS         | Illumina NGS       | Not specified | Plasma           | <20%, >20%       | PDR     | Median(range): 337 (1-917)       | Median(range): 4.34 (2.73-5.92) | 5 |

| Supplementary Material |               |                 |      |      |      |                 |                          |     |                    |               |        |            |         |                                |                             |   |
|------------------------|---------------|-----------------|------|------|------|-----------------|--------------------------|-----|--------------------|---------------|--------|------------|---------|--------------------------------|-----------------------------|---|
| Li yang (2022)         | Asia          | 2014-2015       | 1755 | 1740 | 14   | cross-sectional | Median: 37               | NGS | Illumina NGS       | Not specified | Plasma | 2%         | TDR     | --                             | --                          | 7 |
| Maruapula (2022)       | Africa        | 2012.04-2015.04 | 108  | 103  | 99.1 | cohort          | Median (IQR): 27(24-31)  | NGS | Illumina NGS       | Not specified | Plasma | <20%, >20% | LA-DRVs | Median(IQR):365(225-497)       | Median(IQR): 4.1(3.5-4.6)   | 7 |
| Climaco-Arvizu (2022)  | North America | 2016-2019       | 100  | 96   | 1    | cross-sectional | Median(range): 28(18-66) | NGS | Illumina NGS       | Not specified | Plasma | 1%, 20%    | PDR     | Median(IQR): 150 (68.0-355.78) | Median(IQR): 4.9(4.39-5.40) | 5 |
| Ogola (2022)           | Africa        | 2016.01-2017.12 | 241  | 241  | 68.5 | cross-sectional | Median(range): 37(16-61) | NGS | Illumina NGS       | Not specified | Plasma | 5%, 20%    | PDR     | Median(range): 245 (5–1,100)   | Median(range): 28 (1.4–7.0) | 6 |
| Raymond (2023)         | Europe        | 2018.01-2019.10 | 237  | 237  | 23   | cohort          | Mean ± SD: 41±11         | NGS | Sentosa NGS system | Not specified | Plasma | 3%, 20%    | PDR     | Mean±SD: 345±254               | Mean±SD: 5.04±0.98          | 7 |

MSM, men who sex with men; HTS, Heterosexual; IDU, injective drug users; OGE, originating in countries with generalized epidemics; IQR, interquartile range; SD, standard deviation.
