# Supplementary material for: HIV-1 Drug Resistance Detected by Next-Generation Sequencing among ART-Naïve Individuals: A Systematic Review and Meta-Analysis
Source: Viruses. 2024 Feb 2;16(2):239. doi: 10.3390/v16020239 (PMC10893194; doi:10.3390/v16020239)
Supplement: Supplementary file 1 [file viruses-16-00239-s001.zip]

Archive with 4 entries (4 files):
- Supplementary Figure S1-S6.pdf
- Supplementary Table S1.pdf
- Supplementary Table S2-S4.pdf
- Supplementary Table S5-S8.pdf
